# Supplementary material for: RNA-seq Explores the Mechanism of Oxygen-Boosted Sonodynamic Therapy Based on All-in-One Nanobubbles to Enhance Ferroptosis for the Treatment of HCC
Source: Research Square preprint supplement (doi:10.21203/rs.3.rs-936685/v1), 2021-10-05
Supplement: Supplementary file 1 [file a7f52e3182204825bdff8341.docx]

Table S4 The pearson coefficient between the four co-expression modules and the phenotype

|  | **Class1** | **Class1** |
| --- | --- | --- |
| Mebrown | -0.49692642 | 0.49692642 |
| Meyellow | -0.07872804 | -0.07872804 |
| Meblue | 0.65502943 | -0.65502943 |
| Meturquoise | 0.61517871 | -0.61517871 |
| Megrey | 0.26458005 | -0.26458005 |
